# 1 **Generating fast-twitch myotubes *in vitro* using an optogenetic-based, quantitative** 2 **contractility assay**

3 Katharina Hennig<sup>1</sup>, David Hardman<sup>4</sup>, David Barata<sup>1</sup>, Inês Martins<sup>1</sup>, Miguel O. Bernabeu<sup>4,5</sup>, Edgar R.  
4 Gomes<sup>1,\*</sup>, and William Roman<sup>1,2,3,\*</sup>

5 <sup>1</sup> *Instituto de Medicina Molecular, Faculdade de Medicina, Universidade de Lisboa, Avenida Professor*  
6 *Egas Moniz, 1649-028, Lisboa, Portugal*

7 <sup>2</sup> *Australian Regenerative Medicine Institute, Monash University, Clayton, Australia,*

8 <sup>3</sup> *Victoria Node, EMBL Australia, Clayton, Australia*

9 <sup>4</sup> *Centre for Medical Informatics, Usher Institute, The University of Edinburgh, Edinburgh EH16 4UX,*  
10 *United Kingdom*

11 <sup>5</sup> *The Bayes Centre, The University of Edinburgh, Edinburgh EH8 9BT, United Kingdom*

12 \* *Corresponding authors*

13

14

## 15 **Abstract**

16 The composition of fiber types within skeletal muscle impacts the tissue's physiological characteristics  
17 and susceptibility to disease and ageing. *In vitro* systems should therefore account for fiber type  
18 composition when modelling muscle conditions. To induce fiber specification *in vitro*, we designed a  
19 quantitative contractility assay based on optogenetics and particle image velocimetry. We submitted  
20 cultured myotubes to long-term intermittent light stimulation patterns and characterized their  
21 structural and functional adaptations. After several days of *in vitro* exercise, myotubes contract faster  
22 and are more resistant to fatigue. The enhanced contractile functionality was accompanied by  
23 advanced maturation such as increased width and upregulation of neuron receptor genes. We  
24 observed an upregulation in the expression of distinct myosin heavy chain isoforms (namely, neonatal-  
25 Myh8 and fast-Myh), which induced a shift towards a fast fiber phenotype. This long-term *in vitro*  
26 exercise strategy can be used to study fiber specification and refine muscle disease modelling.

27

28

## 29 **Introduction**

30 Skeletal muscle tissue possesses distinct muscle fiber types, which are broadly categorized by  
31 their contractile properties: slow (type I) and fast (type II) twitch muscle cells (myofibers). The  
32 proportion of fiber types depends on the functional demand of specific muscles (Agbulut et al., 2003).  
33 Slow, fatigue-resistant fibers are predominant in muscles involved in posture whereas fast twitching  
34 fibers possess a higher mechanical force output and are present in muscles devoted to motion  
35 (Schiaffino et al., 2011). Moreover, muscle composition can adapt through fiber type switching in  
36 response to internal and external factors, such as neuromuscular activity, exercise, or hormone  
37 exposure (Blaauw et al., 2013). Ageing, injury and disease have also been linked to changes in fiber  
38 type composition (Jansen & Fladby, 1990). For example, sarcopenia, the age-related loss of muscle  
39 mass, is characterized by a loss of type II-associated satellite cells (Frontera & Ochala, 2015) whereas  
40 nerve denervation, which occurs in certain neuromuscular disorders, leads to a slow-to-fast fiber  
41 switch (Peggion et al., 2017; Ciciliot et al., 2013). Muscle disorders also tend to predominantly affect  
42 one muscle type over another such as in Duchenne Muscular Dystrophy (DMD) in which type II  
43 myofibers are more susceptible to damage (Talbot & Maves, 2016).

44 Despite the importance of fiber type in disease pathophysiology, fiber type is rarely considered when  
45 modelling muscle disorders *in vitro* (Guo et al., 2012). Advances in tissue engineering and *in vitro* cell  
46 models have offered new tools to better mimic native muscle tissue and muscle disorders. Various  
47 techniques have contributed to enhance the structural maturity and contractile functionality of  
48 artificial muscle such as: (i) cell alignment via microfabrication (Bajaj et al., 2011; Zhao et al., 2009), (ii)  
49 3D culture systems (Maffioletti et al., 2018), (iii) exercise-like stimuli (Aguilar-Agon et al., 2019; Sebille  
50 et al., 2017; Asano et al., 2015), and (iv) integration of other cell types (e.g. innervating neurons (Osaki  
51 et al., 2018; Guo et al., 2020; Bakooshi et al., 2019) and vasculature (Osaki et al., 2018)). The validation  
52 of improved myogenesis relies on a combination of molecular, morphological, and functional assays.  
53 However, most studies do not perform any characterization of fiber type composition. As these *in vitro*  
54 systems are increasingly adopted for drug screening and biological investigation, the systematic  
55 characterization of muscle tissue composition is crucial, especially to model diseases affecting distinct  
56 fiber types.

57 The expression of distinct myosin isoforms determines fiber type and contractile properties. Myosin  
58 consists of 2 myosin heavy chains (Myh), 2 regulatory light chains and 2 essential chains. Myh with its  
59 ATPase activity and actin-binding domain is responsible for power strokes during contractions.  
60 Interestingly, ATPase activity of distinct Myh isoforms is directly linked with the myofiber's contraction  
61 velocity (Bottinelli et al., 1994; Bottinelli et al., 1991). Hence, Myh isoforms are the most appropriate  
62 biomarkers to characterize fiber types. During development, the expression of Myh isoforms follows a  
63 sequential, temporal pattern (Agbulut et al., 2003): developmental Myh, namely embryonic Myh3  
64 (emb-Myh3) and neonatal Myh8 (neo-Myh8), are expressed together with slow Myh7 (slow-Myh7).  
65 Throughout the course of differentiation, developmental Myh isoforms disappear when slow-Myh7 or  
66 fast Myh isoform (fast-Myh1 and fast-Myh2) expression is upregulated. The predominantly expressed  
67 Myh isoform determines the adult fiber type and its associated contraction dynamics. Compared to  
68 adult Myh isoforms, embryonic Myh isoforms possess slower activation and relaxation kinetics and a  
69 lower rate of force production (Racca et al., 2013), while adult fibers that predominately express slow-  
70 Myh7 contract with a slower velocity than fibers containing fast Myh isoforms (Pellegrino et al., 2013;  
71 Johnson et al., 2019).

72 In this study, we describe an experimental strategy to alter fiber type composition of *in vitro* muscle  
73 systems. By subjecting myotubes to long-term, intermittent mechanical training, we monitored  
74 structural, functional, and molecular changes underlying fiber type switching. Long-term *in vitro*  
75 exercise alters the temporal protein expression pattern of developmental and adult Myh isoforms:  
76 trained myotubes upregulate the expression of neo-Myh8 and fMyh at day 4 of differentiation. Our  
77 results suggest that rhythmic, long-term mechanical training triggers a phenotypical shift toward a  
78 fatigue-resistant, fast fiber type. This approach could be used to model fiber type-specific diseases and  
79 identify new therapeutic targets.

80

81

82

83

84

85

86

## 87 Results

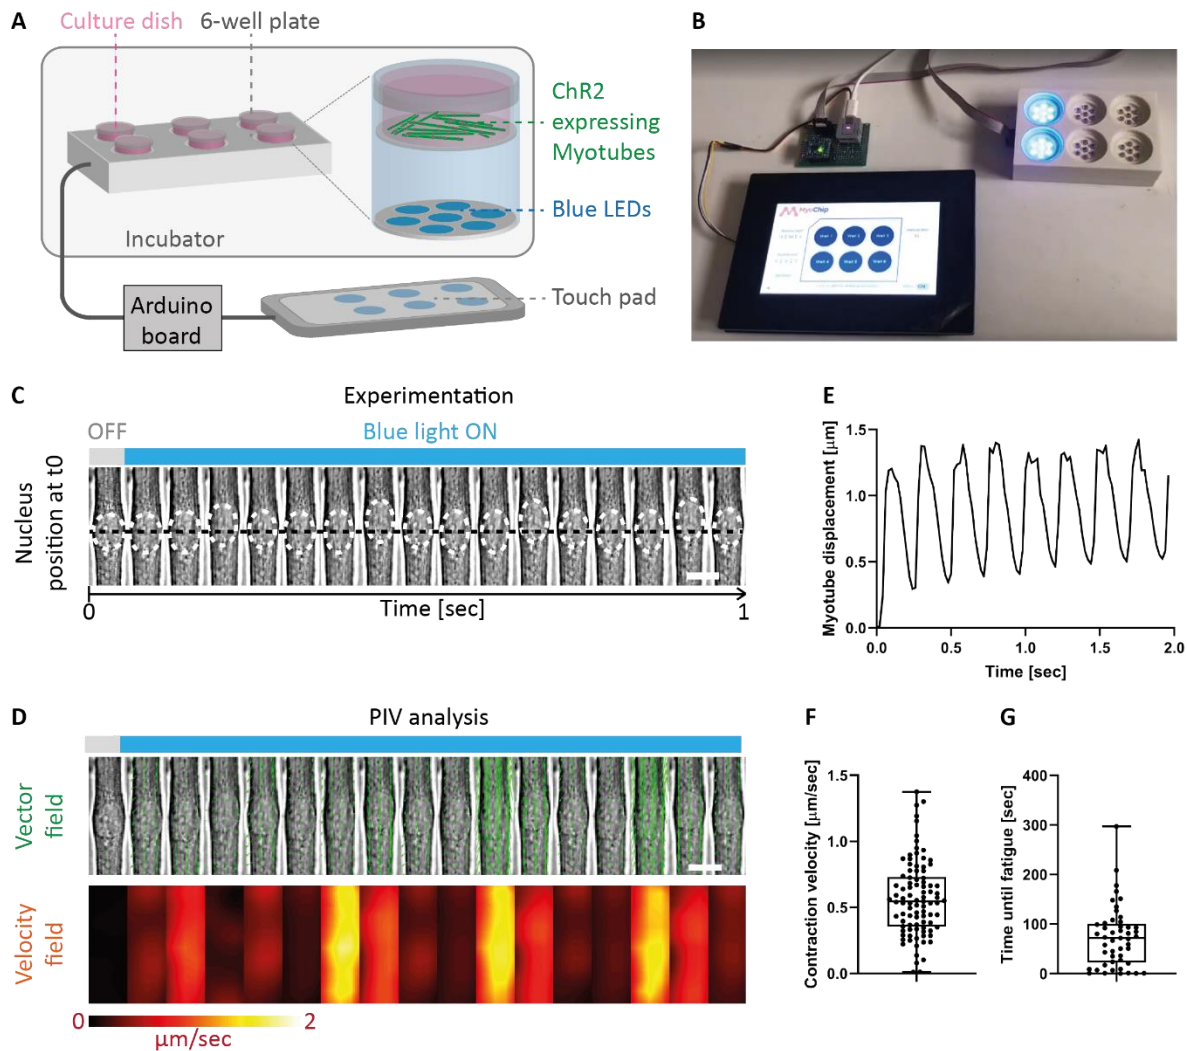

88

89 **Figure 1) Strategy to submit myotubes to long-term light-induced exercise and quantify contraction kinetics with single cell**  
 90 **resolution. A, B) Schematic illustration and image of designed OptoPlate. C) Kymograph of a 4-day myotube continuously**  
 91 **stimulated with blue light. White dashed circles highlight the nucleus and the black dashed line marks the initial nuclear**  
 92 **position before stimulation. D) Particle image velocimetry (PIV) analysis applied to myotube displacement over time.**  
 93 **Displacement vectors (green arrows) and velocity fields (heat map) convey myotube movement. F) Graph plotting computed**  
 94 **displacement curve for a single contracting myotube. G) Boxplot of myotube contraction velocity averaged over 2 seconds. H)**  
 95 **Boxplot of time needed for cells to enter fatigue when continuously light stimulated. Scale bars: 10  $\mu\text{m}$ .**

## 96 Designing a quantitative, optogenetics-based *in vitro* contractility assay

97 We aimed to determine if long-term exercise of *in vitro* myotubes alters contraction dynamics. To  
 98 do so, we relied on an *in vitro* muscle protocol, which generates highly differentiated myotubes  
 99 (Falcone et al., 2014; Pimentel et al., 2017). After 7 days of differentiation, these myotubes exhibit  
 100 hallmarks of mature muscle cells, such as peripheral nuclei, striations, and contractility. To control their  
 101 contraction, we infected these cultures with the AAV9-pCAGW-ChR2-Venus (adenovirus) at day 0,  
 102 resulting in a high percentage of myotubes (90.38 %; **supplementary figure 1A, B**) expressing ChR2 at  
 103 day 4. We confirmed the cells' functional photosensitivity by exposing ChR2-expressing myotubes to  
 104 blue light under an inverted fluorescent microscope. This resulted in 86.99 % of total myotubes  
 105 performing cycles of contraction under continuous illumination.

106 To submit myotubes to specific and long-term stimulation patterns, we designed an optogenetic-  
 107 based, *in vitro* training platform (termed OptoPlate; **figure 1A, B**). The OptoPlate emits blue light pulses

108 with high temporal control for extended durations and is compatible with cell culture. The device  
109 consists of a 3D printed 6-well plate made of polylactic acid (PLA) with integrated blue LEDs (475 nm).  
110 Seven LEDs are grouped under each well and can be controlled independently via an Arduino board. A  
111 touch screen interface allows to set training parameters (e.g. pulse length, light intensity, and duration)  
112 for each 35 mm dish separately.

113 To measure contraction dynamics after long-term training, we designed a quantitative, functional  
114 contractility assay based on particle image velocimetry (PIV) analysis. We experimentally assessed  
115 contractile behaviors at day 4 of differentiation (after 3 days of training) by continuously illuminating  
116 ChR2-expressing myotubes under the microscope and recording contractions for 2 seconds (**figure 1C**).  
117 We used PIVlab, an imaged-based PIV analysis software (Thielicke et al., 2014), to analyze contraction  
118 kinetics quantitatively. The program divides images into interrogation windows, computes the local  
119 displacement of two consecutive windows via maximum correlation methods and outputs vector fields  
120 and velocity magnitudes (**figure 1D**). We use both these measurements to determine contraction  
121 kinetics such as myotube displacement and contraction velocities of single myotubes (**figure 1E, F**).  
122 Finally, we monitored the time until myotubes enter fatigue by continuously stimulating cultures with  
123 blue light until they stop responding (**figure 1G**). We employed this optogenetic contractility assay to  
124 evaluate the effect of long-term exercise on muscle cell function.

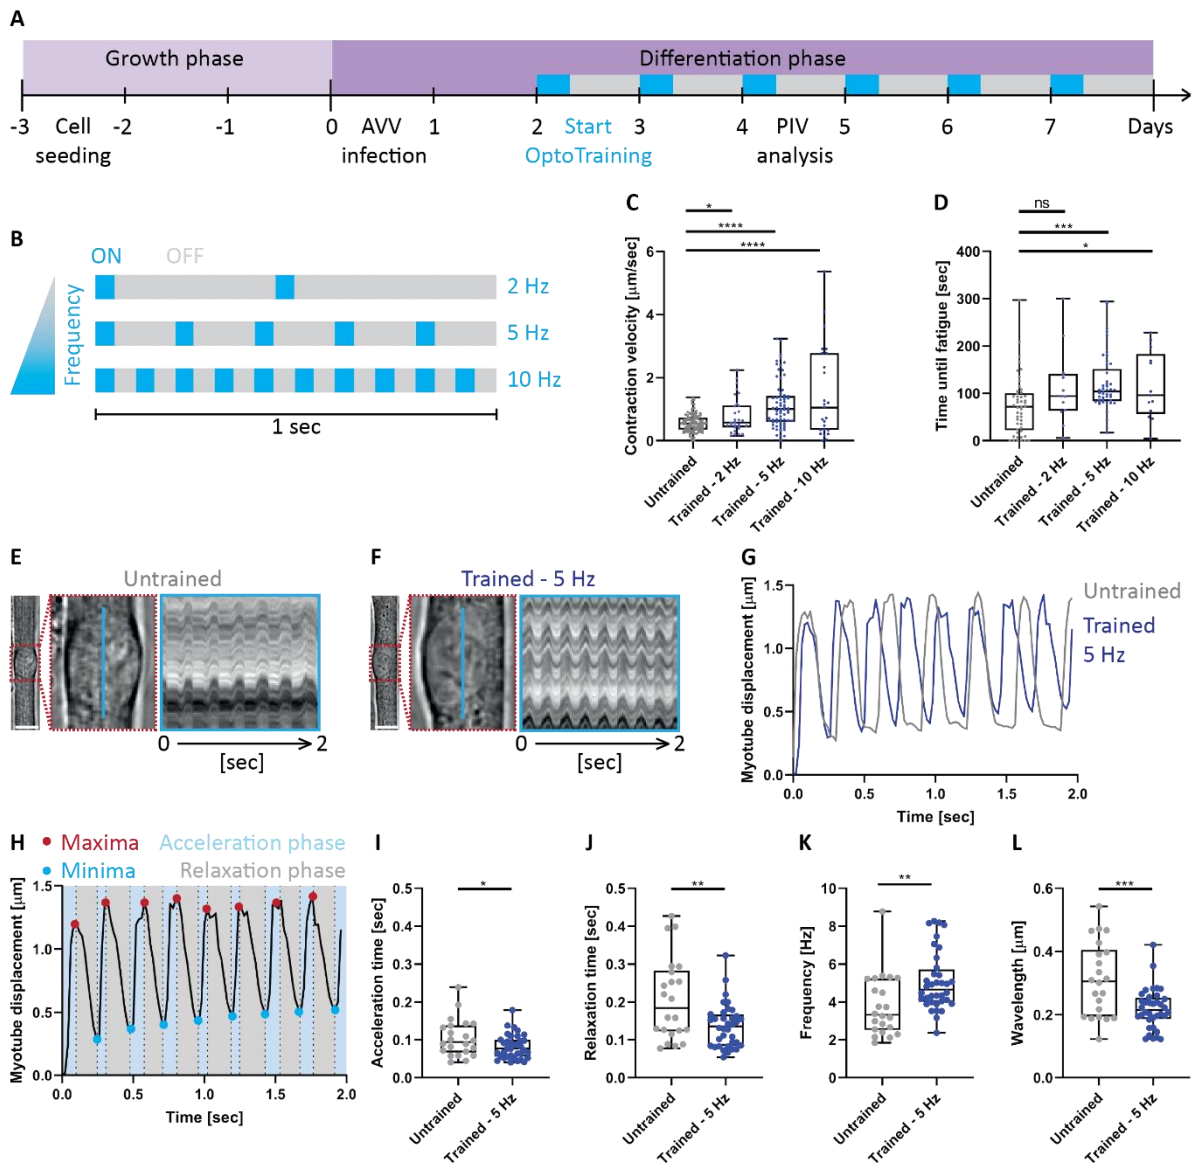

125

126 **Figure 2) Trained myotubes undergo faster contraction cycles.** **A)** Experimental protocol to submit *in vitro* primary mouse  
 127 myotubes to OptoTraining. After the initial growth phase, myoblasts differentiate into multinucleated myotubes. Myotubes  
 128 were infected with AAV9-pACAGW-ChR2-Venus at day 0 and submitted to OptoTraining from day 2 (8 hours per day, blue  
 129 boxes). **B)** Schematic showing the three OptoTraining protocols at 2, 5 or 10 Hz. **C, D)** Boxplots depicting contraction velocities  
 130 (**C**) and time until fatigue (**D**) of myotubes after 3 days of OptoTraining with different frequencies. **E, F)** Left: Representative  
 131 brightfield images of single myotubes with magnifications of myonuclei (red dashed boxes). Right: 2 second kymographs (blue  
 132 line) of untrained (**E**) and trained (**F**) myotubes when continuously stimulated with blue light. **G)** Single track displacement  
 133 curves of untrained (grey) and trained (5 Hz light stimulation frequency: blue) myotubes. **H)** Representative displacement curve  
 134 illustrating metrics of quantitative analysis during contraction: detection of maxima (red) and minima (blue) allows to dissect  
 135 the curve into acceleration (light blue) and relaxation (grey) phases. **I, J)** Acceleration and relaxation time of individual  
 136 myotubes averaged over contractions over 2 seconds. **K, L)** Frequency and wavelength for untrained and trained myotubes.  
 137 Scale bars: 10  $\mu\text{m}$ .

### 138 Long-term *in vitro* exercise accelerates myotube contraction speed and decreases fatigability

139 The OptoPlate allows to submit myotubes to distinct long-term exercise programs by setting  
 140 specific light stimulation parameters (intensity, duration, and frequency). To trigger contractions in a  
 141 non-invasive manner with high temporal control, myotubes were infected with AAV9-pACAGW-ChR2-  
 142 Venus at day 0 of differentiation (**figure 2A**). We first tested if an optimal stimulation frequency  
 143 enhances contractile properties of myotubes. Three OptoTraining protocols were tested: 50 ms light  
 144 pulses at 2, 5 or 10 Hz (**figure 2B**). To mimic chronic exercise, we trained myotubes for 8 hours per day.

145 By using low light intensity, we minimized any phototoxicity effect. Additionally, long-term  
146 OptoTraining did not cause any sarcomeric damage. Although both untrained and trained myotubes  
147 exhibit local sarcomeric scars visualized via filamin C staining (Roman et al., 2021), they display no  
148 significant increase in filamin C mRNA or protein expression (**supplementary figure 2A-E**).

149 Using our PIV-based contractility assay, we investigated functional adaptations of myotubes to the  
150 different Optotraining protocols. Interestingly, myotube contraction velocity positively correlates with  
151 light stimulation frequency: higher stimulating frequencies resulting in faster myotube twitching after  
152 training (**figure 2C**). However, 10 Hz stimulated myotubes are more prone to fatigue (**figure 2D**) for a  
153 marginal increase in contraction velocity when compared to the 5 Hz cohort. As such, we selected 5 Hz  
154 as the optimal training frequency. All further experiments compare untrained control myotubes to the  
155 5 Hz OptoTraining protocol (from here on generally referred to as “trained myotubes”).

156 Individual trained myotubes possess faster contraction cycles compared to untrained control  
157 myotubes (**figure 2E-G**). To understand the origin of this increased contraction speed, we performed  
158 a deeper quantitative analysis of contraction kinetics. For this, we developed an algorithm dissecting  
159 individual displacement curves of contracting myotubes into acceleration and relaxation phases (**figure**  
160 **2H**) and observed a significantly shorter acceleration (**figure 2I**) and relaxation phase for trained  
161 myotubes (**figure 2J**). These trained myotubes therefore undergo contractions with higher frequency  
162 and shorter wavelength leading to faster contraction cycles (**figure 2K, L**).

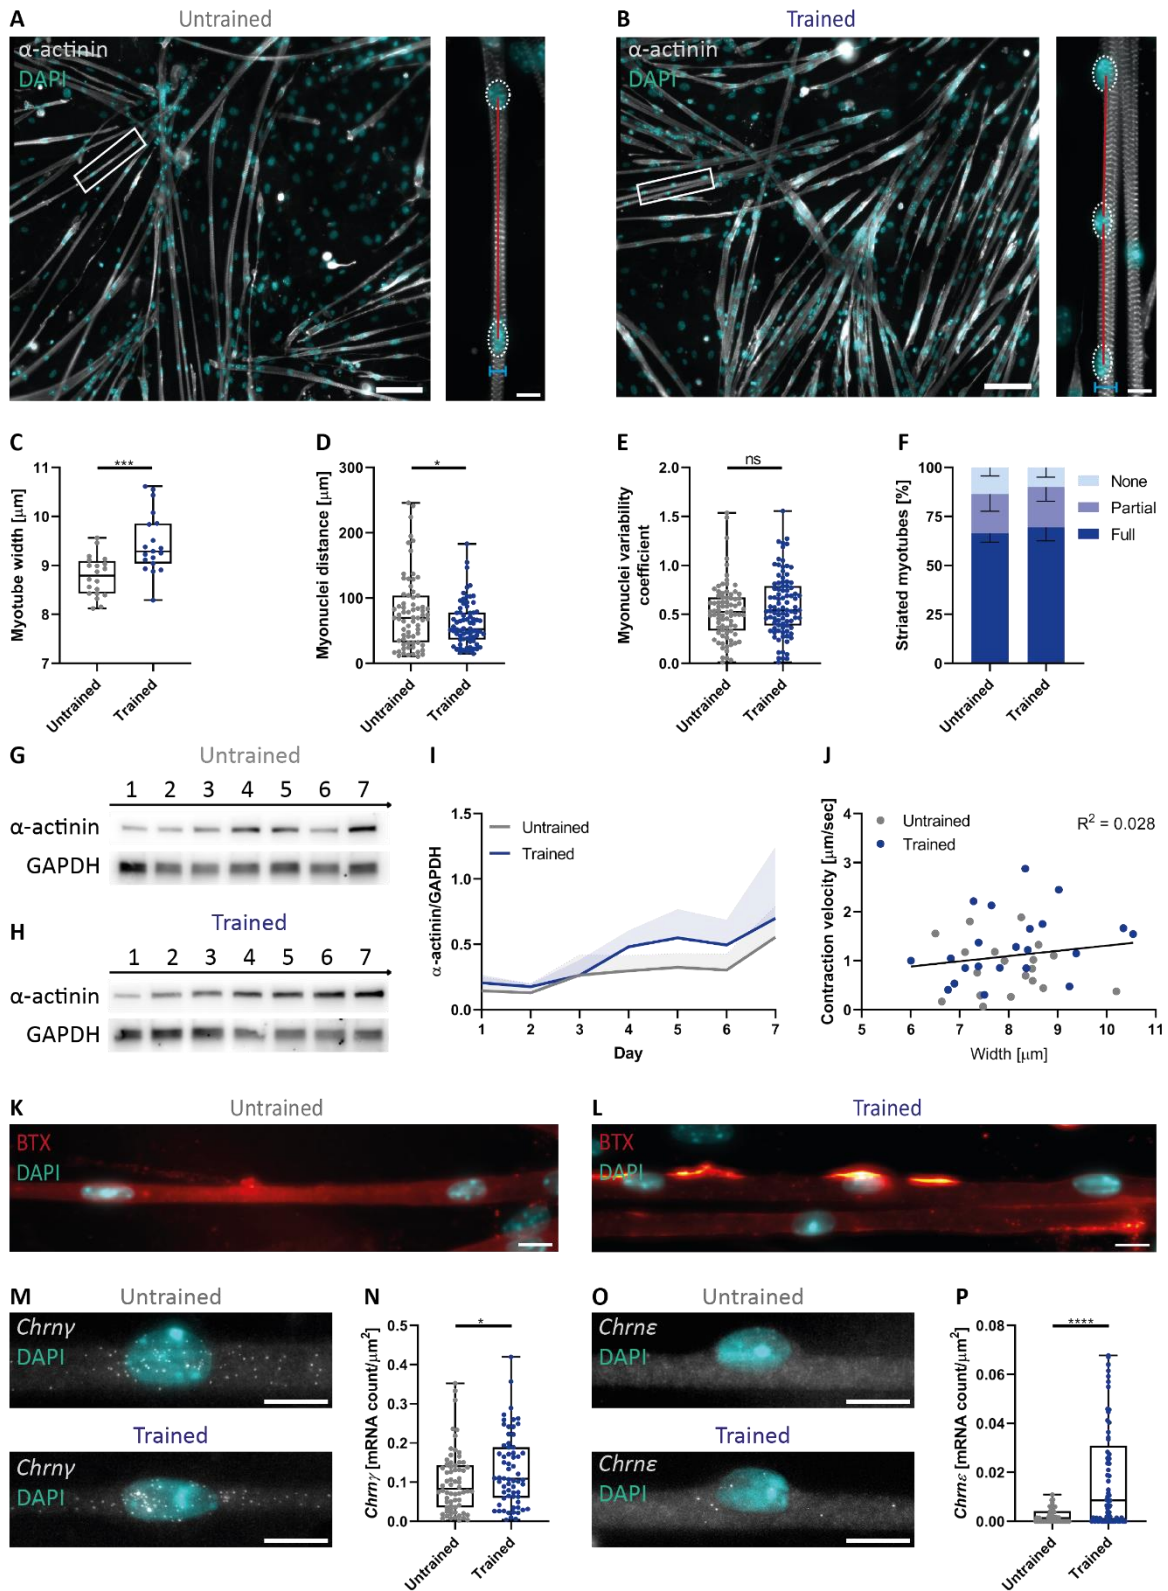

164 **Figure 3) OptoTraining facilitates morphological maturation. A, B)** Representative fluorescent images to assess myotube  
165 morphology of untrained and trained cultures (grey:  $\alpha$ -actinin; cyan: myonuclei; Scale bars: 100  $\mu$ m). Magnifications (white  
166 boxes; Scale bars: 10  $\mu$ m) illustrate quantified tissue quality parameters. Myotube width (blue lines) and myonuclei spacing,  
167 density and uniformity (red lines). **C, D, E)** Boxplots showing **C)** myotube width, **D)** myonuclei distance and **E)** myonuclei  
168 variability coefficient at day 4 of differentiation. **F)** Percentage of striated myotubes (dark blue: fully striated; blue: partially  
169 striated; light blue: non-striated). **G, H)** Western blots of  $\alpha$ -actinin and GAPDH (loading control) protein expression over 7 days  
170 of myotube differentiation. **I)** Graph showing temporal  $\alpha$ -actinin expression normalized to GAPDH. **J)** Contraction velocity  
171 plotted relative to cell width of trained and untrained myotubes.  $R^2$  (0,028) was computed for the whole data set of untrained  
172 and trained myotubes via two-tailed Pearson's correlation. **K, L)** Fluorescence images of  $\alpha$ -bungarotoxin (BTX, red) showing  
173 acetylcholine receptor clusters and myonuclei (DAPI, blue). **M-P)** *Chrny* and *Chrne* smFISH probes (grey) and DAPI staining  
174 (cyan) in trained and untrained myotubes with plot showing *Chrny* and *Chrne* mRNA count per  $\mu$ m<sup>2</sup> myotube area. Scale bars:  
175 10  $\mu$ m.

## 176 **OptoTraining increases cell width and promotes synaptogenesis**

177 Since contraction depends on muscle architecture, we sought to understand if changes in cellular  
178 structures underlie the faster contraction cycles observed after long-term *in vitro* training. We  
179 performed a quantitative structural analysis by extracting parameters of myotube maturation from  
180 immunofluorescent images at day 4 of differentiation (**figure 3A, B**; Hardman et al., 2021). Trained  
181 myotubes display an increased cell width (**figure 3C**), suggesting an addition of sarcomeres due to  
182 training. We also observed shorter myonuclear distances (**figure 3D**) whereas the myonuclei variability  
183 coefficient (a measure of how uniformly myonuclei are distributed within myotubes) remains  
184 unchanged (**figure 3E**). These maturation trends are conserved for 2 and 10 Hz stimulation frequencies  
185 albeit more discrete (**supplementary figure 3A-C**). Surprisingly, we did not observe a significant  
186 difference in the percentage of striated myotubes at day 4 (**figure 3F**), suggesting that initiation of  
187 myofibril assembly is similar in trained and untrained cultures. However, western blot analysis shows  
188 an increased protein expression of  $\alpha$ -actinin for trained myotubes which persists over 7 days (**figure**  
189 **3G-I**). Nevertheless, we did not find a correlation between fiber width and contraction speed (**figure**  
190 **3J**) indicating that faster contractile dynamics in trained cultures are not due to thicker myotubes.

191 As OptoTraining promotes morphological maturation, we aimed to further validate this finding by  
192 looking at acetylcholine receptors (AChR), neurotransmitter-gated ion channels at the neuromuscular  
193 junction. During myogenesis, AChR segments increase in size and change their composition from  
194 embryonic ( $\gamma$ ) to adult ( $\epsilon$ ) subunits (Jin et al., 2008; Cetin et al., 2020). To detect AChR in our cultures,  
195 we first stained myotubes with  $\alpha$ -bungarotoxin (BTX) at day 4 of differentiation. We observed an  
196 increase in AChR clusters around myonuclei from trained myotubes (**figure 3K, L**). To explore further  
197 this enhanced AChR clustering, we evaluated the expression of both gamma (*Chrny*-fetal) and epsilon  
198 (*Chrne*-adult) subunits at the transcriptional level. Using single molecule RNA fluorescence in situ  
199 hybridization (smFISH; Pinheiro et al., 2021) at day 4 of differentiation, we observed a higher  
200 expression of *Chrny* and *Chrne* for trained myotubes (**figure 3M-P**). The detection of adult AChR mRNAs  
201 further confirms enhanced maturation of trained myotubes (Bakooshli et al., 2019) but most likely  
202 does not account for the accelerated contraction dynamics considering contractions are  
203 optogenetically driven.



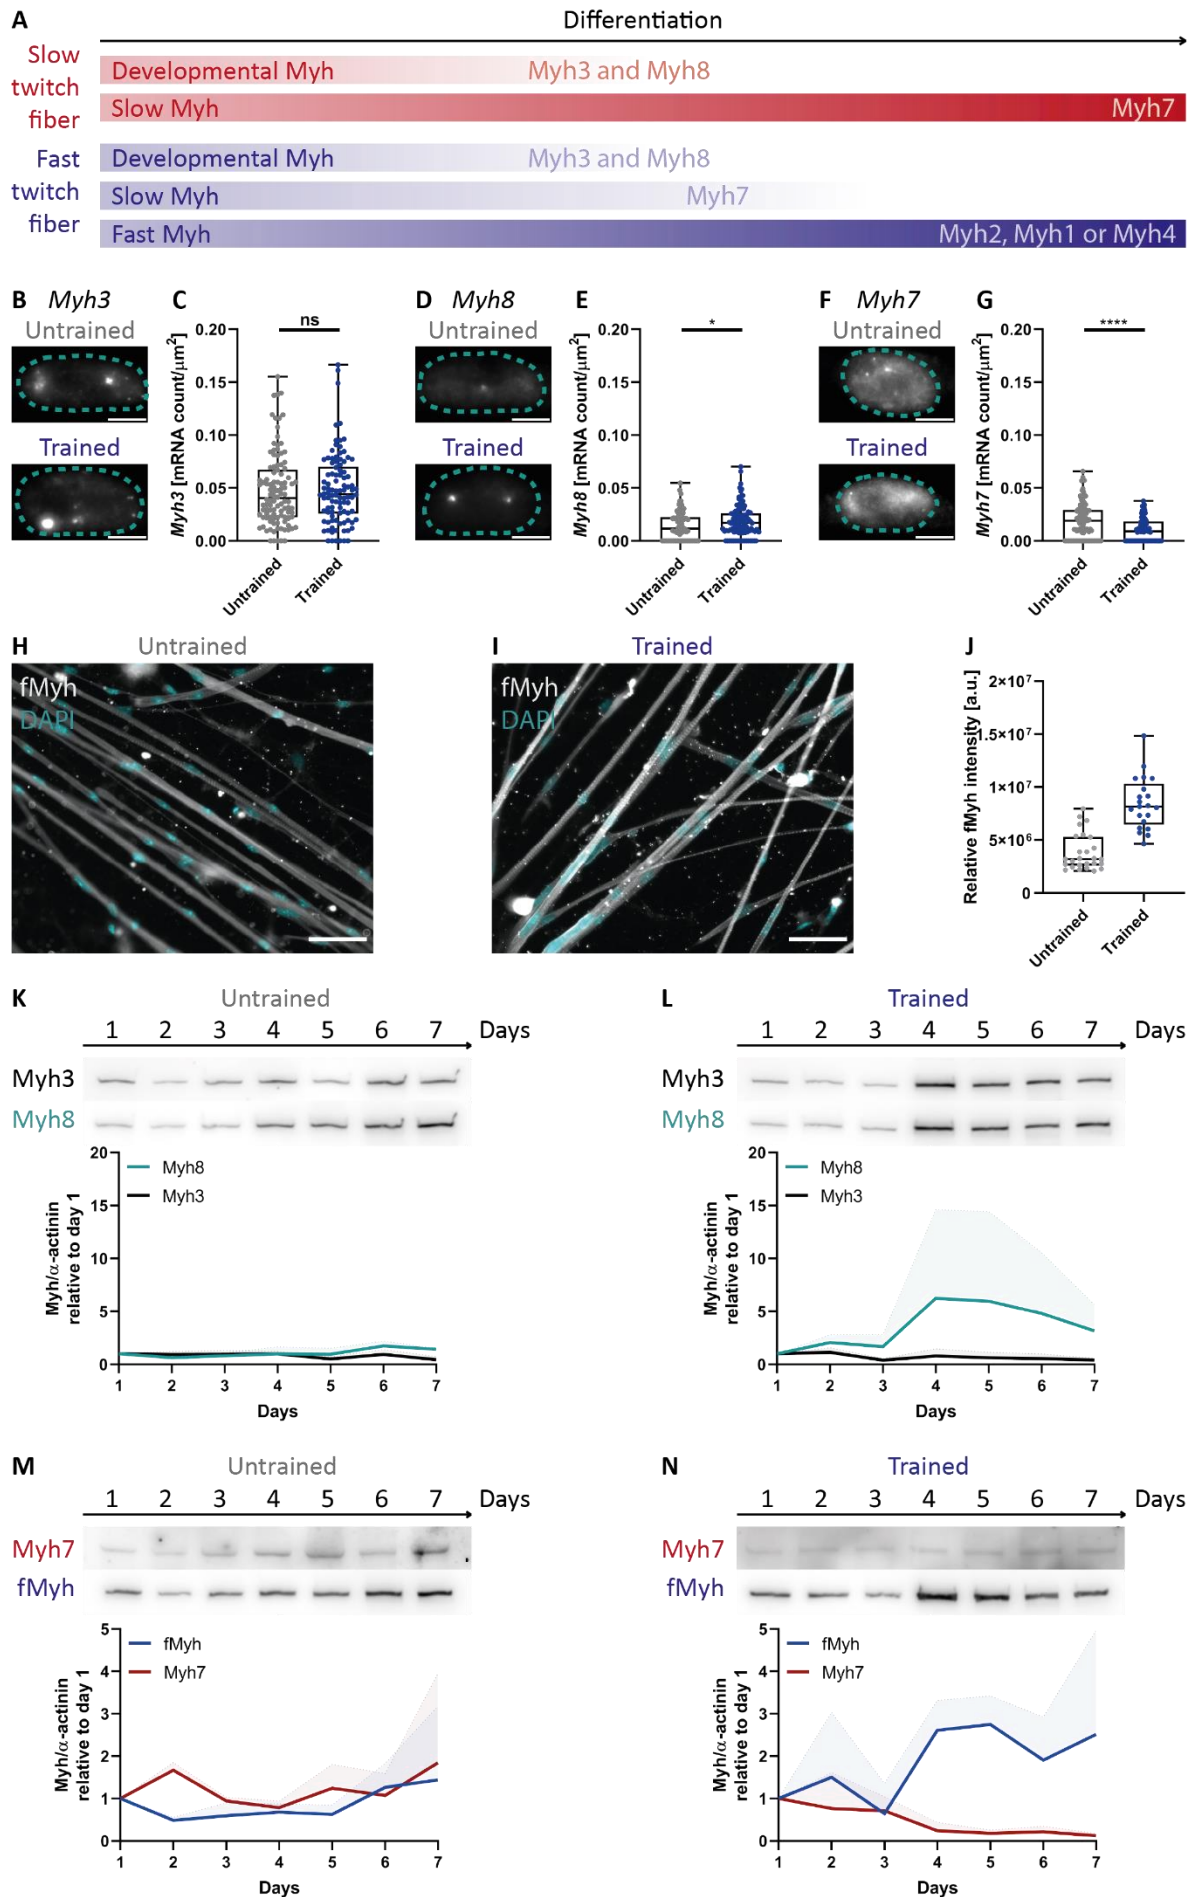

205 **Figure 4) Long-term mechanical training upregulates expression of neo-Myh8 and fMyh isoforms.** **A)** Simplified scheme  
206 showing temporal expression patterns of Myh isoforms for slow and fast twitch fiber types. **B-G)** Left: smFISH for Myh3, Myh8  
207 and Myh7 pre-mRNA expressed in myonuclei (cyan dotted outline) of untrained and trained myotubes. Right: boxplots of RNA  
208 expression per myonucleus area. **H, I)** Immunofluorescence images of untrained and trained myotubes stained for fMyh. **J)**  
209 Measured fluorescence intensity of fMyh per myotube. **K-N)** Western blots of developmental and adult Myh isoforms (top)  
210 with associated graphs showing relative expression profile of respective Myh isoforms normalized to  $\alpha$ -actinin (bottom), which  
211 was used as a muscle-specific loading control. Scale bars B and D: 5  $\mu$ m; Scale bars F and G: 50  $\mu$ m.

## 212 **Increased contractile demand triggers an upregulation of neo-Myh8 and fast Myh**

213 We hypothesized that the faster contractile dynamics after long-term training could be due to  
214 Myh switching. The pattern of Myh expression during development follows a sequential transition  
215 (Agbulut et al., 2003; Brown et al., 2012) from developmental (emb-Myh3 and neo-Myh8) to adult Myh  
216 isoforms (slow-Myh7 or fast Myh (fMyh: fast-Myh2, fast-Myh1, fast-Myh4; **figure 4A**)). We first  
217 investigated the expression of the developmental emb-Myh3 and neo-Myh8 genes at the single cell  
218 level. Due to the sequence homology of Myh genes (Weiss et al., 1999), we designed smFISH RNA  
219 probes against pre-mRNAs to ensure detection specificity. Whereas the RNA levels of emb-Myh3 do  
220 not change after long-term exercise (**figure 4B, C**), we observed a significant upregulation of neo-Myh8  
221 (**figure 4D, E**) and downregulation of fast-Myh7 (**figure 4F, G**) in trained myotubes.

222 As Myh8 upregulation is characteristic of fast fiber type specialization (Schiaffino et al., 2015), we  
223 stained myotubes for fMyh (**figure 4F, G**). We measured a higher fluorescent intensity for trained  
224 cultures (**figure 4H**), suggesting a shift towards a fast fiber phenotype. To confirm this slow-to-fast fiber  
225 type switch, we investigated the temporal expression pattern of developmental and adult Myh  
226 isoforms over 7 days using western blots. Protein expression levels were normalized to  $\alpha$ -actinin to  
227 account for sarcomerogenesis. Over the 7 days of differentiation, untrained cultures express both  
228 developmental and adult Myh isoforms with only minor fluctuations in relative expression (**Figure 4J,**  
229 **K**). In contrast, trained myotube cultures alter their Myh expression profile. For developmental Myh  
230 isoforms, emb-Myh3 decreases slightly whereas neo-Myh8 increases after the onset of training (Day2;  
231 **figure 4K**). For adult Myh isoforms, levels of slow-Myh7 decrease and are accompanied by a rapid  
232 upregulation of fMyhs (**figure 4L**), mainly fast-Myh1 (**supplementary figure 4A, B**). The predominant  
233 expression of neo-Myh8 and fMyh in trained cultures explains the increased contractile velocity and is  
234 characteristic of fast twitch fiber establishment during development (Johnson et al., 2019).

235

236

## 237 **Discussion**

238 Fiber type composition confers muscle the appropriate kinetics to serve their contractile  
239 demands. This is particularly relevant during development (Agbulut et al., 2003) or exercise (Qaisar et  
240 al., 2016), in which fiber types can switch. In this study, we provide an experimental approach to  
241 accelerate myotube maturation and promote fiber type switching in a dish through *in vitro* exercise.  
242 Using an optogenetic setup compatible with cell culture, we induce myotubes to contract according to  
243 specified training protocols over several days. Long-term exercise of myotubes results in faster  
244 contraction dynamics and resistance to fatigue. By monitoring RNA and protein levels of  
245 developmental and adult Myh isoforms, we observed the premise of fiber type switching in trained  
246 myotubes with the upregulation of neo-Myh8 and fMyh. The accelerated contraction dynamics are  
247 also accompanied by faster muscle cell maturation at both structural and transcriptional level. Overall,  
248 we provide an *in vitro* strategy to model fiber type switching during development, exercise, or disease.

249 Submitting myotubes to mechanical stretch is a widely used approach to induce muscle contractions.  
250 Various molecular and biochemical alterations, including improved maturation, increased myotube

251 size, and alignment, have been reported (Ren et al., 2021). Optogenetic stimulation of C2C12, which  
252 under standard culture conditions do not contract, facilitates maturation of striated, contractile  
253 myotubes (Asano et al., 2015). Using pharmacological treatments, the development of contractility  
254 has been linked to an increase of intracellular calcium levels that promote sarcomere assembly (Sebille  
255 et al., 2017; Chapotte-Baldacci et al., 2022). To further assess developmental maturity and define fiber  
256 type, Khodabukus et al. have characterized twitch dynamics of electrically stimulated 3D engineered  
257 myobundles (Khodabukus et al.; 2019). Trained muscle cells possess faster relaxation kinetics  
258 accompanied by higher force production, decreased fatigability, and increased glucose metabolism.  
259 However, no changes in glucose and mitochondria protein levels were detected, suggesting only a  
260 partial shift towards a fast fiber type. Most studies use intermittent stimulation patterns to mimic  
261 neuronal input-like stimuli. A complete fast fiber type shift may require a faster stimulation frequency,  
262 found *in vivo* (Hennig & Lømo 1985), and longer culture times.

263 Improvements of *in vitro* muscle cultures would provide greater control over fiber type switching.  
264 Aligning and attaching muscle cells is a strategy to prolong and mature the cultures allowing to  
265 recapitulate the full transition from fetal to adult Myhs. Other cell types could also be co-cultured to  
266 influence the expression of certain fiber type and the coordinated expression of Myh within a single  
267 myofiber. Myotubes cultured without other cell types adopt a “default path” towards a slow fiber type.  
268 However, firing frequency of motor neurons during development determines myofiber type (Hennig  
269 & Lømo 1985), and denervation leads to uncoordinated Myh expression (Dos Santos et al., 2020). Both  
270 processes could be recapitulated in optogenetically-stimulated motor neurons co-cultured with  
271 muscle. Such systems would be particularly relevant to investigate myonuclei coordination and the  
272 mechanisms of fiber type switching at several cellular levels (genetic, structural, functional, and  
273 metabolic).

274 Controlling fiber type in cultured muscle systems will also be relevant for disease modelling when using  
275 patient-derived induced pluripotent stem cells (iPSCs). As many myopathies preferentially affect  
276 certain fiber types (Talbot & Maves, 2016), biological investigation and drug testing should be  
277 performed accounting for fiber type composition. It will primarily be interesting to observe if the  
278 susceptibility of certain fiber type to muscle diseases is conserved *in vitro*. This would provide drug  
279 development models for therapies aimed at promoting fiber switching to the less afflicted fiber type.  
280 For example, compounds found to preserve muscle integrity in Duchenne Muscular Dystrophy (DMD)  
281 promote the less affect slow muscle phenotypes. Additionally, exercise protocols can be personalized  
282 to prevent or delay fiber switching in muscle disorders worsened by fiber composition alterations.

283

284

## 285 **Material and Methods**

### 286 **Primary mouse myotubes *in vitro* culture**

287 All procedures using animals were approved by the institutional ethics committee and followed the  
288 guidelines of the Portuguese National Research Council Guide for the care and use of laboratory  
289 animals.

290 *In vitro* myotubes were generated as described previously from primary mice myoblasts (Pimentel et  
291 al., 2017). Shortly, myoblasts were isolated from C57BL/6J mice 5-7days after birth. The tissue was  
292 minced and digested using 0.5mg/ml collagenase (Sigma) and 3.5 mg/ml dispase (Roche) in Phosphate-  
293 buffered saline (PBS). The cell suspension was then filtered and cells were plated in Iscove’s Modified  
294 Dulbecco’s Medium (IMDM, Thermo Scientific, 37°C, 5% CO<sub>2</sub>). After 4 hours, the medium was collected

295 containing non-adherent myoblasts. Cells were then centrifuged (1400 rpm, 5 min) and resuspended  
296 in growth medium (IMDM + 20% Fetal Bovine Serum (FBS) + 1% chick Embryo Extract + 1%  
297 Penicillin/Streptomycin). Cells were plated onto IBIDI dishes coated with 1:100 matrigel (Corning Inc.)  
298 at a density of 200000 cells/ml. Differentiation was initiated after 4 days by changing the medium to  
299 differentiation medium (IMDM + 10% Horse serum (HS) + 1% Penicillin/Streptomycin). At day 1 of  
300 differentiation, a thick layer of 150  $\mu$ l matrigel (1:1) was added on top of forming myotubes and the  
301 medium was supplemented with 100ng/ml agrin. Cells were cultured up to 7 days at 37°C and 5% CO<sub>2</sub>.

### 302 **OptoTraining**

303 At day 0 of differentiation, cells were infected with pCAGW-ChR2-Venus-AAV9 (Addgene). 0.5  $\mu$ l were  
304 added to 500  $\mu$ l differentiation medium. Cells were incubated O/N at 37°C and 5% CO<sub>2</sub>. Cultures were  
305 washed once with PBS, before matrigel and differentiation medium were added as described before.  
306 At day 2, OptoTraining was initiated using the OptoPlate. Trained cell were submitted to specific  
307 temporal light pattern (50 ms light pulses at 2, 5, or 10 Hz) for 8 hours per day. ChR2 expressing control  
308 cells were kept in the dark.

### 309 **Cell fixation and immunostainings**

310 Cells were washed 1 x with PBS and fixed for 10 minutes with 200  $\mu$ l of 4% PFA. Subsequently, dishes  
311 were washed 2 x with PBS. If needed, cells were incubated with 1:50 Alexa Fluor 488  $\alpha$ -bungarotoxin  
312 (BTX, Invitrogen) in PBS for 20 min at RT. Cells were permeabilized with 0.5% tritonX100 in PBS for 5  
313 minutes and blocked with 10% Goat serum in PBS with 5% BSA (blocking buffer, BB) for 1 hour. Primary  
314 antibodies were diluted in 200  $\mu$ l BB with 0.1% saponine and incubated overnight at 4°C. Dishes were  
315 washed with PBS 3 x for 5 minutes under agitation. Secondary antibodies (1:400) together with DAPI  
316 (1:10000) were incubated in BB + 0.1% saponine for 1 hour and subsequently washed 3 x for 5 minutes  
317 with PBS under agitation. 150  $\mu$ l of fluoromount-G (SouthernBiotech) were added per dish and dried  
318 for 24 hours at 4°C. All use antibodies are listed in table 1. Images were acquired using an inverted  
319 widefield fluorescence microscope (Zeiss Cell Observer).

### 320 **Structural analysis of cellular maturation**

321 Stained images were pre-processed using FIJI (Schindelin et al., 2012) to apply z-projection, subtract  
322 background and binarize images stained with DAPI and  $\alpha$ -actinin. The proportional area of myotubes  
323 in each image was calculated using an in-house MATLAB (R2019a; MathWorks, Natick, MA) code to  
324 determine the proportion of regions with  $\alpha$ -actinin fluorescence in binarized images. The total area of  
325 myotubes was then divided by the total length of the centerline skeletons of the myotube regions to  
326 estimate the average myotube width for each image. DAPI stained nuclei residing within regions of  $\alpha$ -  
327 actinin fluorescence were designated as myonuclei. The sum of myonuclei in each image was  
328 determined using MATLAB code and normalized to calculate myonuclei per mm<sup>2</sup>.

329 Myonuclei distribution was measured in MATLAB by selecting myotubes at random and manually  
330 labelling nuclei. This spatial distribution data was then used to calculate the mean distance between  
331 neighboring nuclei in each myotube. Uniformity of myonuclei distribution was determined using the  
332 *coefficient of variation* (standard deviation in distance divided by mean distance between nuclei for  
333 each recorded myotube). The percentage of randomly selected myotubes with full, partial (<50%) and  
334 no striations were recorded manually.

335 FIJI macros for pre-processing images and MATLAB code for segmentation and calculation of metrics  
336 is available on Github (<https://github.com/dhardma2/MyoChip/Opto>).

### 337 **Western blots**

338 Dishes with myotubes were washed 3 x with cold PBS on ice. Cells were removed from ice and 200  $\mu$ l  
339 of lysis buffer (1% SDS in 100mM TRIS-HCl, pH 8) added to dish. Cells were scrapped and transferred  
340 into 1.5 ml Eppendorf. To remove matrigel, cells were spun down for 5 minutes at 14000 rpm. The  
341 supernatant was collected and stored at  $-80^{\circ}\text{C}$ . For western blots, cell lysate protein concentrations  
342 were measured using the BCA kit (Pierce). Samples were mixed with 1:4 lammeli buffer and boiled at  
343  $95^{\circ}\text{C}$  for 5 minutes. The same amount of sample (10 or 30 ng/ml) were loaded onto 4-15% pre-cast Bis-  
344 tris gel (Invitrogen) and run at 100V. Proteins were transferred onto nitrocellulose membrane for 75  
345 minutes at 100V. Subsequently, membranes were blocked for 1 hour in blocking buffer (BB) using 5%  
346 non-fat dry milk in TBS-T (TRIS-buffered saline with 0.1% Tween 20). Primary antibodies in BB were  
347 incubated O/N at  $4^{\circ}\text{C}$ . Membranes were washed 3 x with TBS-T under agitation and then incubated  
348 with HRP-conjugated secondary antibodies for 1 hour at room temperature. Membranes were washed  
349 3 x in TBS-T under agitation, visualized using ECL reagent (Pierce) and imaged using Amersham  
350 ImageQuant 800 Western blot imaging system. Quantification was done in Image Lab. All used  
351 antibodies are listed in Table 1.

### 352 **Single molecule FISH**

353 For *Chrn $\gamma$* , *Chrn $\epsilon$* , and *filamin C*, mRNA probes were designed to align with the coding sequence of the  
354 mRNA of interest using the Stellaris probe designer (sequences listed in Table 2). For myh isoforms,  
355 smFISH probes were designed for pre-mRNA sequences containing introns and exons to ensure high  
356 specificity. All probes were coupled to Quasar570. The dried oligonucleotide probe was dissolved in  
357 400  $\mu$ l RNase free water (Invitrogen) to a stock concentration of 12.5  $\mu\text{M}$ . Culture dishes with  
358 myoblasts were washed with RNase-free PBS (Ambion) and fixed 10 minutes at RT in fixation buffer  
359 (10% formaldehyde solution, Sigma Aldrich, in nuclease free water). Cells were washed 2 x and  
360 permeabilized O/N in 70% ethanol at  $4^{\circ}\text{C}$ . For hybridization, dishes were washed with wash buffer (1x  
361 saline-sodium citrate, SSC, Sigma-Aldrich, in 10% deionized formamide, Ambion) for 5 minutes. 1.25  
362  $\mu\text{M}$  smFISH RNA probe in 10% formamide, 1% dextran sulfate (Sigma Aldrich) in 2x SSC and incubated  
363 O/N at  $37^{\circ}\text{C}$ . Myotubes were washed 2 x in wash buffer (containing 50 ng/ml DAPI at second wash) for  
364 30 minutes at  $37^{\circ}\text{C}$ . 1 ml 2x SSC was incubated for 5 minutes at room temperature. Cells were then  
365 mounted using 150  $\mu$ l Vectashield Antifade Mounting Medium (Vector Laboratories) and stored at  $4^{\circ}\text{C}$ .  
366 Cells were imaged within one week using an inverted widefield fluorescence microscope (Zeiss Cell  
367 Observer). All images were processed in Fiji. Z-stacks of myofibers were projected to maximum  
368 intensity, background was subtracted and images were binarized. For *Chrn $\gamma$* , *Chrn $\epsilon$*  and *filamin C*,  
369 mRNA signals were counted within the perinuclear region (myonuclei  $\pm 50 \mu\text{m}$  along the myotube). For  
370 myh isoforms, the area per myonuclei was computed.

### 371 **Contractility assay and PIV analysis**

372 To determine functional properties of untrained and trained cells, we measured myotube contraction  
373 velocity and fatigability at day 4 of maturation. To do so, we performed time-lapse imaging with high  
374 temporal resolution (20ms/frame) using a Zeiss Cell Observer SD microscope (63x oil immersion  
375 objective Plan-Apochromat 63x, NA M27). Single striated myotubes with nuclei at the periphery were  
376 chosen. First, cells were imaged without photostimulation. Subsequently, cells were submitted to  
377 continuous blue light illumination (470nm). We computed contractile parameters over time periods of  
378 2 seconds in MATLAB using PIVlab, an image-based PIV analysis software (Thielicke et al., 2014). Due  
379 to heterogeneity of contraction along the muscle cell, myonuclei were used as reference points to  
380 measure displacement and instantaneous velocity per myotube. The program divides images into small  
381 interrogation windows (FFT window deformation, interrogation area phase 1: 64 pixel; phase 2: 32  
382 pixel). Via maximum correlation method the local displacement of two consecutive windows is  
383 computed. From this, the program calculates quantitative parameters (e.g. velocity, displacement) of

384 myotube movement and displays vector and velocity magnitude fields. To assess fatigability, myotube  
385 contractions were induced via continuous light stimulation. And the time was measured until cells  
386 stopped moving.

### 387 **Displacement curve analysis**

388 A Fast Fourier Transform (FFT) was applied to myonuclei displacement curves in MATLAB to determine  
389 the frequency of a representative sine wave for the motion of each cell after stimulation. To assess  
390 variation in muscle cell twitch motion over time, in-house MATLAB code was used to find the maxima  
391 and minima of single cell displacement curves recorded over 2 seconds. The amplitude for each twitch  
392 was calculated and its contraction and relaxation time were computed. The code used for PIV data  
393 analysis is available on Github (<https://github.com/dhardma2/MyoChip/Opto>).

### 394 **Statistical Analysis**

395 Statistical analysis was carried out in GraphPad Prism (using unpaired parametric t-test). The  
396 distribution of data points is expressed as mean  $\pm$  SD for three or more independent experiments.  
397 Outliers were identified using ROUT method (Q=1).

### 398 **Table 1) List of primary antibodies**

| Target        | Dilution immunostaining | Dilution western blots | Company                              | Catalog number |
|---------------|-------------------------|------------------------|--------------------------------------|----------------|
| Alpha actinin | 1:200                   | 1:1000                 | Sigma Aldrich                        | A7732          |
| fMyh          | 1:200                   | 1:5000                 | Santa Cruz Biotechnology             | sc-32732       |
| Myh1          | -                       | 1:1000                 | Thermo Fisher Scientific             | # PA5-117077   |
| Myh2          | -                       | 1:5000                 | Santa Cruz Biotechnology             | sc-53095       |
| Myh3          | -                       | 1:5000                 | Developmental Studies Hybridoma Bank | F1.652         |
| Myh7          | -                       | 1:250                  | Developmental Studies Hybridoma Bank | A4.951         |
| Myh8          | -                       | 1:10000                | Thermo Fisher Scientific             | PA5-72846      |
| Filamin C     | 1:200                   | 1:5000                 | MyBioSource                          | MBS2026155     |

399

### 400 **Table 2) List of FISH probes**

401

### 402 **Acknowledgements**

403 We thank all partners of the MyoChip consortium and all members of the Edgar Gomes and the  
404 Claudio Franco laboratory. We thank Afonso Malheiro and Judite Costa for support and discussions.  
405 We thank António Temudo, Ana Nascimento, Aida Lima and José Rino, from the Bioimaging facility at  
406 iMM, for imaging assistance. **Funding:** This project has received funding from the European Union's  
407 Horizon 2020 research and innovation programme under grant agreement FET-OPEN No 801423 and  
408 the European Research Council H2020-GA 810207-ARPCOMPLEXITY as well as the Association  
409 Française contre les Myopathies (AFM).

410

411 **Author contribution:** K.H carried out experiments and analyzed data. D.H performed the  
412 computational analysis. D.B. designed and produced the Optoplate. I.M. isolated primary myoblasts.  
413 K.H. and W.R conceived and designed the experiments. K.H, M.O.B, E.R.G. and W.R. wrote the  
414 manuscript with assistance from other authors and all authors participated in the critical review of the  
415 manuscript.

#### 416 **Competing interests**

417 The authors declare no competing or financial interests.

#### 418 **References**

- 419 Agbulut, O., Noirez, P., Beaumont, F., & Butler-Browne, G. (2003). Myosin heavy chain isoforms in  
420 postnatal muscle development of mice. *Biology of the Cell*, 95(6), 399-406.
- 421 Aguilar-Agon, K. W., Capel, A. J., Martin, N. R., Player, D. J., & Lewis, M. P. (2019). Mechanical loading  
422 stimulates hypertrophy in tissue-engineered skeletal muscle: Molecular and phenotypic  
423 responses. *Journal of Cellular Physiology*, 234(12), 23547-23558.
- 424 Asano, T., Ishizuka, T., Morishima, K., & Yawo, H. (2015). Optogenetic induction of contractile ability in  
425 immature C2C12 myotubes. *Scientific reports*, 5(1), 1-8.
- 426 Bajaj, P., Reddy Jr, B., Millet, L., Wei, C., Zorlutuna, P., Bao, G., & Bashir, R. (2011). Patterning the  
427 differentiation of C2C12 skeletal myoblasts. *Integrative Biology*, 3(9), 897-909.
- 428 Bakooshli, M. A., Lippmann, E. S., Mulcahy, B., Iyer, N., Nguyen, C. T., Tung, K., ... & Gilbert, P. M. (2019).  
429 A 3D culture model of innervated human skeletal muscle enables studies of the adult neuromuscular  
430 junction. *Elife*, 8.
- 431 Blaauw, B., Schiaffino, S., & Reggiani, C. (2013). Mechanisms modulating skeletal muscle  
432 phenotype. *Compr Physiol*, 3(4), 1645-87.
- 433 Bottinelli, R., Betto, R., Schiaffino, S., & Reggiani, C. (1994). Unloaded shortening velocity and myosin  
434 heavy chain and alkali light chain isoform composition in rat skeletal muscle fibres. *The Journal of*  
435 *physiology*, 478(2), 341-349.
- 436 Bottinelli, R., Schiaffino, S., & Reggiani, C. (1991). Force-velocity relations and myosin heavy chain  
437 isoform compositions of skinned fibres from rat skeletal muscle. *The Journal of physiology*, 437(1), 655-  
438 672.
- 439 Brown, D. M., Parr, T., & Brameld, J. M. (2012). Myosin heavy chain mRNA isoforms are expressed in  
440 two distinct cohorts during C2C12 myogenesis. *Journal of muscle research and cell motility*, 32(6), 383-  
441 390.

- 442 Cetin, H., Beeson, D., Vincent, A., & Webster, R. (2020). The structure, function, and physiology of the  
443 fetal and adult acetylcholine receptor in muscle. *Frontiers in molecular neuroscience*, *13*, 581097.
- 444 Ciciliot, S., Rossi, A. C., Dyar, K. A., Blaauw, B., & Schiaffino, S. (2013). Muscle type and fiber type  
445 specificity in muscle wasting. *The international journal of biochemistry & cell biology*, *45*(10), 2191-  
446 2199.
- 447 Dos Santos, M., Backer, S., Saintpierre, B., Izac, B., Andrieu, M., Letourneur, F., ... & Maire, P. (2020).  
448 Single-nucleus RNA-seq and FISH identify coordinated transcriptional activity in mammalian  
449 myofibers. *Nature communications*, *11*(1), 1-16.
- 450 Falcone, S., Roman, W., Hnia, K., Gache, V., Didier, N., Lainé, J., ... & Gomes, E. R. (2014). N-WASP is  
451 required for Amphiphysin-2/BIN 1-dependent nuclear positioning and triad organization in skeletal  
452 muscle and is involved in the pathophysiology of centronuclear myopathy. *EMBO molecular  
453 medicine*, *6*(11), 1455-1475.
- 454 Frontera, W. R., & Ochala, J. (2015). Skeletal muscle: a brief review of structure and function. *Calcified  
455 tissue international*, *96*(3), 183-195.
- 456 Guo, X., Badu-Mensah, A., Thomas, M. C., McAleer, C. W., & Hickman, J. J. (2020). Characterization of  
457 functional human skeletal myotubes and neuromuscular junction derived—from the same induced  
458 pluripotent stem cell source. *Bioengineering*, *7*(4), 133.
- 459 Hardman, D., Hennig, K., Gomes, E. R., Roman, W., & Bernabeu, M. O. (2021). An *in vitro*-agent based  
460 modelling approach to optimisation of culture medium for generating muscle cells. *bioRxiv*.
- 461 Hennig, R., & Lømo, T. (1985). Firing patterns of motor units in normal rats. *Nature*, *314*(6007), 164-  
462 166.
- 463 Jansen, J. K. S., & Fladby, T. (1990). The perinatal reorganization of the innervation of skeletal muscle  
464 in mammals. *Progress in neurobiology*, *34*(1), 39-90.
- 465 Jin, T. E., Wernig, A., & Witzemann, V. (2008). Changes in acetylcholine receptor function induce shifts  
466 in muscle fiber type composition. *The FEBS Journal*, *275*(9), 2042-2054.
- 467 Johnson, C. A., Walklate, J., Svcevic, M., Mijailovich, S. M., Vera, C., Karabina, A., ... & Geeves, M. A.  
468 (2019). The ATPase cycle of human muscle myosin II isoforms: Adaptation of a single mechanochemical  
469 cycle for different physiological roles. *Journal of Biological Chemistry*, *294*(39), 14267-14278.
- 470 Khodabukus, A., Madden, L., Prabhu, N. K., Koves, T. R., Jackman, C. P., Muoio, D. M., & Bursac, N.  
471 (2019). Electrical stimulation increases hypertrophy and metabolic flux in tissue-engineered human  
472 skeletal muscle. *Biomaterials*, *198*, 259-269.
- 473 Maffioletti, S. M., Sarcar, S., Henderson, A. B., Mannhardt, I., Pinton, L., Moyle, L. A., ... & Tedesco, F.  
474 S. (2018). Three-dimensional human iPSC-derived artificial skeletal muscles model muscular  
475 dystrophies and enable multilineage tissue engineering. *Cell Reports*, *23*(3), 899-908.
- 476 Osaki, T., Sivathanu, V., & Kamm, R. D. (2018). Crosstalk between developing vasculature and  
477 optogenetically engineered skeletal muscle improves muscle contraction and  
478 angiogenesis. *Biomaterials*, *156*, 65-76.
- 479 Osaki, T., Uzel, S. G., & Kamm, R. D. (2018). Microphysiological 3D model of amyotrophic lateral  
480 sclerosis (ALS) from human iPS-derived muscle cells and optogenetic motor neurons. *Science  
481 advances*, *4*(10), eaat5847.



- 482 Peggion, C., Massimino, M. L., Biancotto, G., Angeletti, R., Reggiani, C., Sorgato, M. C., ... & Stella, R.  
483 (2017). Absolute quantification of myosin heavy chain isoforms by selected reaction monitoring can  
484 underscore skeletal muscle changes in a mouse model of amyotrophic lateral sclerosis. *Analytical and*  
485 *bioanalytical chemistry*, 409(8), 2143-2153.
- 486 Pellegrino, M. A., Canepari, M., Rossi, R., D'antona, G., Reggiani, C., & Bottinelli, R. (2003). Orthologous  
487 myosin isoforms and scaling of shortening velocity with body size in mouse, rat, rabbit and human  
488 muscles. *The Journal of Physiology*, 546(3), 677-689.
- 489 Pimentel, M. R., Falcone, S., Cadot, B., & Gomes, E. R. (2017). *In vitro* differentiation of mature  
490 myofibers for live imaging. *JoVE (Journal of Visualized Experiments)*, (119), e55141.
- 491 Pinheiro, Helena, et al. "mRNA distribution in skeletal muscle is associated with mRNA size." *Journal of*  
492 *cell science* 134.14 (2021): jcs256388.
- 493 Qaisar, R., Bhaskaran, S., & Van Remmen, H. (2016). Muscle fiber type diversification during exercise  
494 and regeneration. *Free Radical Biology and Medicine*, 98, 56-67.
- 495 Racca, A. W., Beck, A. E., Rao, V. S., Flint, G. V., Lundy, S. D., Born, D. E., ... & Regnier, M. (2013).  
496 Contractility and kinetics of human fetal and human adult skeletal muscle. *The Journal of*  
497 *physiology*, 591(12), 3049-3061.
- 498 Ren, D., Song, J., Liu, R., Zeng, X., Yan, X., Zhang, Q., & Yuan, X. (2021). Molecular and biomechanical  
499 adaptations to mechanical stretch in cultured myotubes. *Frontiers in Physiology*, 12.
- 500 Roman, W., Pinheiro, H., Pimentel, M. R., Segalés, J., Oliveira, L. M., García-Domínguez, E., ... & Muñoz-  
501 Cánoves, P. (2021). Muscle repair after physiological damage relies on nuclear migration for cellular  
502 reconstruction. *Science*, 374(6565), 355-359.
- 503 Schiaffino, S., & Reggiani, C. (2011). Fiber types in mammalian skeletal muscles. *Physiological*  
504 *reviews*, 91(4), 1447-1531.
- 505 Schiaffino, S., Rossi, A. C., Smerdu, V., Leinwand, L. A., & Reggiani, C. (2015). Developmental myosins:  
506 expression patterns and functional significance. *Skeletal muscle*, 5(1), 1-14.
- 507 Schindelin, J., Arganda-Carreras, I., Frise, E., Kaynig, V., Longair, M., Pietzsch, T., ... & Cardona, A.  
508 (2012). Fiji: an open-source platform for biological-image analysis. *Nature methods*, 9(7), 676-682.
- 509 Sebillé, S., Ayad, O., Chapotte-Baldacci, C. A., Cognard, C., Bois, P., & Chatelier, A. (2017). Optogenetic  
510 approach for targeted activation of global calcium transients in differentiated C2C12  
511 myotubes. *Scientific reports*, 7(1), 1-10.
- 512 Talbot, J., & Maves, L. (2016). Skeletal muscle fiber type: using insights from muscle developmental  
513 biology to dissect targets for susceptibility and resistance to muscle disease. *Wiley Interdisciplinary*  
514 *Reviews: Developmental Biology*, 5(4), 518-534.
- 515 Talbot, J., & Maves, L. (2016). Skeletal muscle fiber type: using insights from muscle developmental  
516 biology to dissect targets for susceptibility and resistance to muscle disease. *Wiley Interdisciplinary*  
517 *Reviews: Developmental Biology*, 5(4), 518-534.
- 518 Thielicke, W., & Stamhuis, E. (2014). PIVlab—towards user-friendly, affordable and accurate digital  
519 particle image velocimetry in MATLAB. *Journal of open research software*, 2(1).

520 Weiss, A., Schiaffino, S., & Leinwand, L. A. (1999). Comparative sequence analysis of the complete  
521 human sarcomeric myosin heavy chain family: implications for functional diversity. *Journal of*  
522 *molecular biology*, 290(1), 61-75.

523 Zhao, Y., Zeng, H., Nam, J., & Agarwal, S. (2009). Fabrication of skeletal muscle constructs by  
524 topographic activation of cell alignment. *Biotechnology and bioengineering*, 102(2), 624-631.
